# Supplementary material
Source: PubMed Central journal article supplement (PMC1413825)
Supplement: pnas_0511090103_2.pdf [file pnas_0511090103_2.pdf]

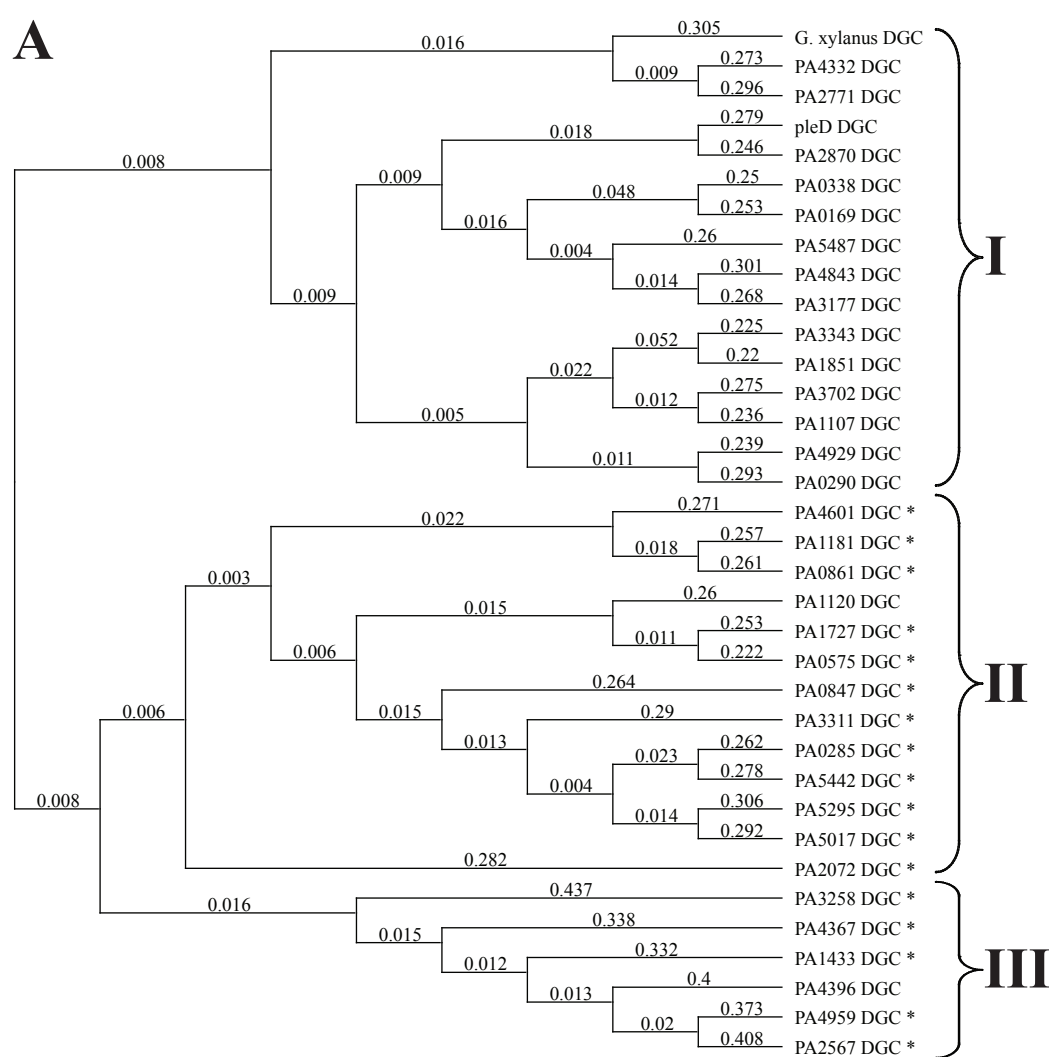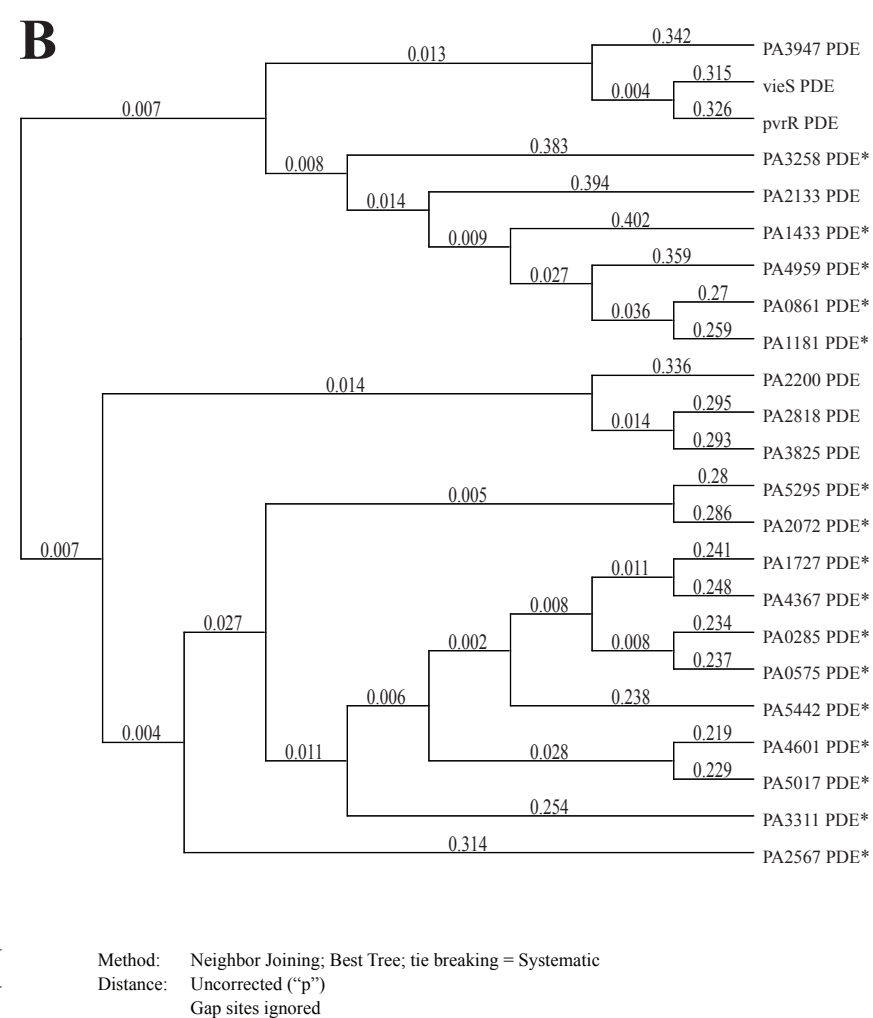

C

CONSENSUS A D LTGL NR F L L LL DLD FK IND G H GD L A R R D A  
 10 20 30 40 50 60 70 80 90  
**G. xylanus DGC** KSLAATDP LTGLFNRGG FNNV LQTAVE DKSQNTDRDMLVMFDLGGFKQINDIHG-HHAGDVVV LKVISNRL LALVH----PEDAVC  
**PA4332 DGC** LEDLVATDEL TGLFNRRHFMRLASRAL-EDLLPNRG-HGLALIDLDFHFKRINDRHG-HAAGDRVL QTFAAVARSCLR----DGDVLA  
**PA2771 DGC** DREQRKSLLD PTLQLWNRAGFHALHQHELE-ELARASDQRIGIYSDIDHFKRINDTLG-HRAGDQVSL REAASRLRAALR----PEDLLA  
**PleD DGC** LAVTDQTLGLNRRYMTGL LDSLVR-KRATLGGDPPYSALLIDIDFFFKRINDTFG-HDIGDEV LRFALRLASNVR----AIDLPC  
**PA2870 DGC** RLLASTDTLTGLNRRHSFLHQAEMLL-KAERFRHP CVALMLDIDHFKNINDSHG-HLTGDRAL QRVAETL RQGLR----EVDLLG  
**PA0338 DGC** SEIDPLTEL YNRKFEQCLHHEW-MRRQRHGRTALMMIDVDFHFKRINDLFG-HSTGDRVL VAFGRLVASELR----EVDVLA  
**PA0169 DGC** LALKEASIRDPL TGLPNRRMLLERLREEN-ERSQRHGQSYV LAMLDVDFFKVNDTWG-HDSGDRVL VEIFARAMESELR----EYDLCG  
**PA5487 DGC** RQKALTDPL TGLPNRAALSERLEQEV-ARRHRDGRDL LFAVLDIDHFKRINDDFG-HLAGDKVL KTIAGEL RKRRLR----QADFLA  
**PA4843 DGC** KARMYRDSL TGLYNHHTTLLQLLEDAR-LRRARDGGP LSLAMLDIDHFKRINDDFG-HPMGRDVKIGKGLALFLKQRLR----KTDHIG  
**PA3177 DGC** QTLALRDALT GTGNRIAMDQALGRELE-ELARRNLQPLSLVMLDIDHFKRINDYHG-HAVGDEAL KAVAE TIKDHLR----NVDVMV  
**PA3343 DGC** RVMADHDSL TGLNRRSFNQHLDRLLV-RQAQREKQTLALLL CVDHDFKAYNDRYG-HOAGDAV LQRIGAVFEANARR----PLDMAV  
**PA1851 DGC** GMAEQDSSL TGLVNRYYELLAQRAL-EQGAREEKGVALL LVDDVDYFKAYNDRYH-HPAGDAAL RQLGVVLRQGGARR----PLDIAA  
**PA3702 DGC** QRLMNSDGLTGLSNRRHFDEYLEMEW-RRSLRGGSELALL LDVDDYFKSYNDTFG-HVAGDEAL RQVAGATIREGCSR----SSDLAA  
**PA1107 DGC** EYLAGHDPL TGLFNRRFDQLVLMEL-ARIDARQOPQLS LLMVDLDFHFKYINDRYG-HPFGDEV LRHAANLRGNTR----SSDSVA  
**PA4929 DGC** LQYAAHHDPL TGLGNRRHLMEFAESAL-DDARRHGSMALL IDLDFHFKPINDTHG-HDAGDFV LQNVAQRLRHCVR----TEDCVA  
**PA0290 DGC** QRLATTDL TGLTQSNRRRYFDSEAAAF-KECRREGIPLAFLL LDVDDFKKINDRFG-HQVGDQV LQRIAQSGSAALR----RGDLFG  
  
**PA4601 DGC** HRLAAYDALT HLPNRTLFQDR LHTAL-QQAERNQGWV LMFLLD DRFKPINDSLG-HAAGDRML QEVATRL SACSVS----QDDTVA  
**PA1181 DGC** SYHASHDAL TGLFNRTKFEEL LQRAL-ANQERATQHALL CDFLDLR FKVVNSAG-HAAGDML LRELSRL LADTR----ASDTLA  
**PA0861 DGC** SWQATHDAL TGLNRRFEYRLQIAL-ERALESTRSGHALL FDLQFKLVNDTCG-HAAGDEL LRQVCTLL QQGLR----EGDTLA  
**PA1120 DGC** LAHQAHHDSL TSLPNRAF FEGRLSRAL-RQAEHREQLAVLF DSDRFKE INDRLHG-HAAGD TVLVNIAMRIRGQLR----ESDLVA  
**PA1727 DGC** IQLALHDNLT KLPNRM LDDRL EQAT-QQATRDHREFAVLFMDLGGFKAVNDAYG-HHLLGDLL IEVAERIRANVR----AQDTIA  
**PA0575 DGC** ARLDYQAHHDP LTGLPNRLL FESRLNHAL-DEAREESP GALVLF DDLDRFKHINDSLG-HPIGDLL KAIAEERLRDQLR----VDVTVA  
**PA0847 DGC** LEMAYRDP LTGLGNRKA FDEQLGQAL-LRAGSGSELALL LD DRFKEVNDRFG-HDIGDAL LRVTAEVRSTLR----QPDKAY  
**PA3311 DGC** SLRQMARYDSL TGLQNRTAFNEVFVQHL-ENCLRGKGLAVMFLD DHFKRINDSLG-HDSGDEAL LRVSELRISVLR----DSDVVA  
**PA0285 DGC** DFLAHHDSL TGLPNRVLL RERIEQAL-ENCKRDVTAGALL IDLDFHFKINDSLG-HTTGDML LKESVKR LQHQLD----ERCLLS  
**PA5442 DGC** HLLHYDEL TGLANRR LFRERLHEAA-QRARQEEGGLALL IDL DRFK LNDL SG-HEVADQL RREMAQRLRTAP----EANTLA  
**PA5295 DGC** QLLAEQDPL TGLANRQGFTL LAARL-ESSDGRG--LVLGHLDL NFRHVNSLG-HQGGDRL LQVNVLR LRGFME----NGDSL A  
**PA5017 DGC** QQHIEKLA YRDNLTGLANRHYF IGALEERL-FEFDGR--LSLLLDV DNFKRIINDSLG-HQTGDKL VLSARLRSLG----DSATLA  
**PA2072 DGC** QHLSLHDALT GLPNRRNKL FQFLERLL-AEKAGKS-PVAVLMLD DRFKPINDQHG-HPAGDAV LVAIAEERLRASTR----DQDMVA  
  
**PA3258 DGC** QQARHANP LTL LPGNVPIQQCLERLL---QRRRE--AVICYIDIS FKPINDLYG-YARGDEV L LCLAQCLSERIDP---GSD FVG  
**PA4367 DGC** LRSQYDFLT GLPNRQLLQQLDQLDGLD-DGAGRQR RVAVLCLGLD FFKINEQYT-YQLGDDLL LALADRLRGHSA----RLGSLA  
**PA1433 DGC** RAQAYQDSSL TGLPNRRL FADAR LNEQL--GAGEHEHAGCYLLL LRLNDL NGLNQLRG-QGRTDELI QAVARLLVDS CGQQGRADWLLA  
**PA4396 DGC** MEERNLVDTLT GLGNPRYL RQKLADSL-RQVETRGGALCYLLL VGMPEAPV LNRQRHG-EAFHRELL LQVARR LQQLVLR----PLDVLV  
**PA4959 DGC** REVSSQDPVY TGLYNRSHFLDLMDAAV-QQAVTARKPST LAYIHLNGYPSLQADHG-LSGIDL L LQLAGL MREQFG----EADLA  
**PA2567 DGC** RSTNYIDEPTGL YNRRLRLQLQEDVSLRQ--QRD GALT V IAADLPLALLNTITRTL G-YPFSDNLML EARDRIAE L P----DFTLYK

I  
II  
III

CONSENSUS R GGDEFA LL A AERL T S G L AD ALY AK GRN  
 100 110 120 130 140 150 160 170 180  
**G. xylanus DGC** RLGGDEFALILNHTLHKFFLS LMLEKL LAELAEPIEVGNT---MNVVSGS IGVTPIASQES-----AES LQKNADIALYA AKRAGGHQ  
**PA4332 DGC** RYGGEEFV L L LPHA-DAEQLES CCEERL RLAFAEQAEPIVGVG---VDTLVLSV GM TLLYADDD-----LDEAL QRADQAL YRAKRGGRNR  
**PA2771 DGC** RFGGEEFVAMVRRV-ETTELTMIANR IRELMEATPIDCAG---TSVPV TISAGCTLAGSGEE-----PERALARADAA LYDAKRA G  
**PleD DGC** RYGGEEFVIMPDT-ALADALRIAER IRMHVSGSPFTVAH-GREMLNTVISIGV SATAGEGD-----TPEALLKRADEGVYQAKASGRNA  
**PA2870 DGC** RLGGEEFAALLPEV-SLDQALDVAEERLRAGVEALRVSNPD-G-EPLRNVTSIGV ALRRADAGD-----DLES LLVRAD SALLYQAKS GRNR  
**PA0338 DGC** RWGGEEFILLLPET-GLEAAAALAEERLRQRVRSQSFMEG-E-RLTASFVGVGLND--GET-----LDL LCRVDDAL YRAKQR-RD-C  
**PA0169 DGC** RWGGEEFLLLPQT-RLQDAGPVLERVRDSVRTLAVRVGT-E--ALSTVASV GTEHRIGET-----YSQTVNRADAA LLDAKRSGRDCV  
**PA5487 DGC** RFGGEEFVLLPAT-SLEAGRQLLERLRRAAIAACPFFHFGK-E--PLSITCSA GITAFEGNEA-----GEVVFERADQAL YRAKRAGRDR  
**PA4843 DGC** RYGGEEFV LVPDT-DLDAARLVLDEIRQFAEIHYP AQP-T--DLRCTFSCG IAE LTPDL-----IKSMAKQADEAL YRAKRGGRNR  
**PA3177 DGC** RFGGEEFV LLSST-PLQAACMVGERLRQAVEELD YRHAG-E--PLKLSISLGCADLRPGE G-----SDDL RRVDAEAL YRAKRDGRNR  
**PA3343 DGC** RLGGEEFALLLYGA-NEHEARLRAEALRAQVQALRMEHEA-SDTAREVTLSV GSCWLPPTPGND--LKRLYDLYEHADRAL YEAKAFGRNV  
**PA1851 DGC** RLGGEEFAVLLYDS-EEGNLT AIAEERLRQAVEALRGIHGLG-SAGPCLTISLV G VAYSTS GMG-----LDAL YREADRAL YEAKDAGRNA  
**PA3702 DGC** RYGGEEFV LVPGT-SPGGARLLAEKVRRTVESLQISHDQ-PRPGSYLTVS IGVSTLVPGGGG---QTFRVL IEEMADQAL YQAKNNGRN  
**PA1107 DGC** RLGGEEFLLLPDT-AEQQARSLAEKLRERLEGPLATQD-G--VLCVLTASIFG VASLDGGGG---ASYEQLY SAADQAL YRAKSSGRNR  
**PA4929 DGC** RLGGDEFV LLVGGSNAEQHARDIAERLL RREL-AKPVEFAK-Q--WLVTIPSI IGVTLFPGDALQ-----DFGLYKAAADQAL YRVKAGGRAG  
**PA0290 DGC** RIGGEEFV LPPGC-DEQTA RQIGERLQREVRQLRFQEGE-Q--SFGITVISOGLV LVLQADDE-----GLGAL YSRADAA MYSAK RQKDC  
  
**PA4601 DGC** RMG GDEF TLL LPSQGDREI LKRAIQVAEL L GRLAR PFTLE GREFFVTSIGV ALSPODGA-----ELSL MKNADTAMY HAKEMGKNN  
**PA1181 DGC** RLGGDEFGLL LFD-CDLAEAEQVASKLIEIQC---VRFPWGR LRYDV GASIGITALATSR-----STSE LMSQADVAC YAAK HAGRNR  
**PA0861 DGC** RLGGDEFGLLEN-CPAEKAVEIADHLRKTVQD---LHFTWSGPPFNCTVSVGLVHL L PGIS-----TLEEALRSADMAC YMAKEKGRNR  
**PA1120 DGC** RLGGDEFV L LAPLASGADALRIADNI ASMQA---PIRLSD GSTVSTSLTI GIALYPEHAD-----TPAALL HDAMMYIAKRRARGS  
**PA1727 DGC** RLGGDEFV L L-IEAREPADAA TLAEKLVKRISQ---PYQI-SRHEVRSAS I GIALY PGDQ-----TRHE LMINADAAMY HAKDQGRNG  
**PA0575 DGC** RLGGDEFI L L PGLHQESDAEHVARK L LNAFTA---PFQA-EGHEFFVSASV GIALFPKDGD-----DAPT LVKNADAAMY RAKSRGRSRIE  
**PA0847 DGC** RLGGDEFV L LLED S-QENNPORLAERL LAAVLQPIALNGE---RIDFVTPS I GIALYPRHAG-----DAEGLVRAADSAMY QAKQRNH  
**PA3311 DGC** R FAGDEFV L LADLT-QDH EAHILSQR LMKKKEPIALDG---RTLVTASV GVS LFPNDGE-----QCEE LKKNAGLAL HQSKACGR  
**PA0285 DGC** RLGGDEFV L LVEND-DPEAVARLSQR LLDGFPAPFVHLCQ---PIYISASL GVS LYFEDAS-----DVDH LMQHADAAL FQAKDSGRNA  
**PA5442 DGC** RL AGDEFV L LDG GGTGAALSRLAERL L VLQRNPVSVLG---HEL I GASL GVS LYFSEQAR-----EISV LMSQANL AQHAKLGQNTF  
**PA5295 DGC** RLGSDEFV L LDTRRDPQRAERVAER LVEICLQEPYWDG---SLLLGCSL GLAHARADGE-----ADPL MWHAHIAMQAKASROGCT  
**PA5017 DGC** R FASNEFV L LDDT-AVEKGESIAA QVHMLDKPLFDN---QLINITG SI GLASAPQHG-----DPQT LMKYAGLA H KAKANGKHQV  
**PA2072 DGC** RLGGDEFV VVSTHVSSKLETEKFC SRLIDVTRN--E IAY-EGHS FHV GAS IGV LALAPEHG---DPRGL LRCADV AMY EAKKA GRNT  
  
**PA3258 DGC** H I G G D D F M L V L G P E D W R T I D R L L E T F Q S Q C R R F Y S R E H L E A C F V A H N R H G Q R E E Y P L L S V G V V H L P A E A C Q G M D A A H L A T L S E A K R Q A K A V P G S Y  
**PA4367 DGC** RLGGDQFV L VQADIEQPYEA AELAQSI L DGL EA---PFEI-DQHEVRLRATIGITLFPEDGE-----TTEK L L Q K A E Q T M T L A K T R S R N R  
**PA1433 DGC** RSRGGEFV L LAPGC-SREQERLAEEICEGLENLARTGAS---DLTPVAYLGISAFAGDS-----PADLLARADQALAEASQPAQP  
**PA4396 DGC** R L D E Q H F A L I T L V E D L H E C S S S F K R L H D G L N L K A F T S---E G F T S L K A G T A M L G L D S G---A L P L G D I E L L Q R T E A L L P D A Y A S G R I A  
**PA4959 DGC** R F G D S I F A A L F K G K-TPEQQAALQRLLKKNVNHFLFELNG---RSAQATLSIGVAGLDEKTA-----KAQDMNR ARHCADDAARKGGSQ  
**PA2567 DGC** -I S P T R F G L L L P R Q-QQEETE SVCLRL LRAFESPVV CRG---IPIKAVI VGL V L P L A D D P L A G---DQDWLRLVVSVA ADDARDRGVGW

I  
II  
III

Figure 6C

# D

Consensus: LR AL L L YQP L G EAL RW HP G P FIP AE GLI L WVL A L

10 20 30 40 50 60 70 80

PA3947 PDE ELPSVADVVRGIDNGE-FAEAYYQPKVALDGGGLIG--AEVLARWNHPHL-GVLPSSHFLYVMEYTNLVVDKLFWQLFSQGLATRR  
pvR PDE ETPHGRALLDALHNEQ-LVTWFQAKKSLHTGRIVG--AEALIRWSHPQH-GLLLPSCFMSDDVATGLHEALLWRVLEQLTNAQE  
VieS PDE AITLTCEIEEQAFLDH-IFNYYQPQDFRS GAMVG--VEALVRYEHPHTH-GMLSPAVFLPLIEQCGLHEKLFLLTVEKSVSALAE  
PA3258 PDE VTEQLSALDSILAHGD-LHCLFQPILSLSERRLVG--YEALTRGP-SNS-PLHSLALFAVARQCGRLELLELLCRQRAFSRFR  
PA2133 PDE DLRLARRFQAALARGR-VRLDWQAVRHAGHPWEPLYRETLRLVTAASGEPPLTQELTLALERGLTLRLLDRCVLTGTVLDRLN  
PA1433 PDE SQDWHWDIDQALERR-LLLYFQPVVDCLDTRQVHL-HKVLARLDDPAQ-TAIAAGRFLPWIERFGLWAARLDLAMLQESLEHLR  
PA4959 PDE QRGDVIAI LQQALLETNS-FRLLFQPVVISLRGDSHEN--YEVLRLLNPPQG-QEVPAAEFLHAAKEAGLAEKIDRWVILNSIKLLA  
PA1181 PDE DILLASGLREALENDR-FQLQAQEVVPGPRRDGRHYELLRLLYDDPG-QMTPPGAFFPAAERFNLMASIDRWVINEALINFG  
PA0861 PDE EMTWVQRHLLALEEDR-FSLYAQPIVPLGEGAEGLHVE-ELLRLRDEGG-RLVPLSFLIPAERYGLMTLIDRWVVENAFRTL  
PA2200 PDE EKLPARLLRALKREA-LEVHYQPIVRLASGRACAG--VEALARWTDSSL-GRVSPDVFIGALEESGDIETLRFVFRRAALKQLG  
PA2818 PDE RLSLVGDMYRAMRARE-FHMVYQPIHLDTGECRGG--VEALVRWRQRPDR-SQVRPDIFFPLAEEDNGMIGDLTRHIFGLVAADLA  
PA3825 PDE VASPSSELRRALAEANE-FIPYYQPLSPGQGGRWIG--VEVLWRWHHPRE-GLIRPDLFIIPAERSGLIVMTRALMRQVGEDLG  
PA5295 PDE LADLEAELRRALRRDE-LELHYQPRCLDSGRIVG--LEALVRRWHGER-GLLTPSEFVPLAEESGLIVPLGYWVIARALRDMQ  
PA2072 PDE KKLRETELRAALQNGE-FELYYQPRFLAQEQTAS--AEALIRWNHPRR-GLIGPDEFFIGLAEESDLIVQIGNVWLREACATAA  
PA5442 PDE LRLETRLRKAVEEGQ-LDVHYQPKCLASARPDAS--VEALVRWHHPPEE-GMIPPSFTFIPLAEESGLIAGEFVLLRRAFLQAA  
PA1727 PDE QLQLLHDLRQALERRQ-LVLYHYQPKVLAPNGPMVG--VEALRWEHPQH-GLIIPPQDFPLAEKTKGLIVQIGEWVLDEACRQMR  
PA4367 PDE RRELEKDLRALQRHE-LHLVYQPVVDYRDHRVVG--VEALRWRQHPLH-GFVPPDLFIPLAEENQNGSIFSIGEWVLDAQCRQLR  
PA0285 PDE HVQVESALRHALEANE-LRVHYQPVHDLASGRIVG--VESLVRWQHPER-GLVPPGFFVPAEECGLIAALDNWVLRKACRQMR  
PA0575 PDE RMALETETRRALERDE-LQLYYQPKLSLESGLLVG--AEALVRWHHPHF-GEISPERFIPLAEDCGLIPLGDDVYLGACQQMG  
PA4601 PDE ERLELESDLRRALELGE-FVLYHYQPKFTGDRRLTG--AEALRWRQHPRR-GLVPPSEFVPLAEETGLVAQVGDWLLAEACKQLR  
PA5017 PDE KLFVESNLRRAEAQNE-LAVHYQPKLRSGLLVG--LEALRWRQHPEK-GMIRPDRFISVAEETGLIVPIGWVIREACRQAR  
PA3311 PDE TQELQMEEEE LQQALRDDQ-LELHYQPIALALADGEVHQ--LEALVRRWHPTQ-GLLGDRFIPLAEENGMIDQLDDWVLRACRDLR  
PA2567 PDE AFTLLTSLSQAIGTEEGFHLVYQPKIDLPTGRCTG--VEALRWRWHHPQL-GFVSPAEFVPLAEKTKALMRPLSDWVLRHAMAQLA

Consensus: VN S L L L LE TE LR LG A DDFGTGY

90 100 110 120 130 140 150 160 170

PA3947 PDE KLAQLG---QPINLAFNVHP-SQLGSRA LAENISALLTEFHLPPSSVMFEI TETGLISAPASSLENLVR LRIMG CGLAMDDFGAGY  
pvR PDE SWRRAG---YEIPVSVNLPP-HLLDNQELPDRLEYVYGARGACTSSLCFEL TESSVTLLSSNYAGACRLRMKGFGLAQDDFGQGY  
VieS PDE SIGAD-----LQLSVNISQ-RNLQHS-ICDPIALICERYGFPASKLLEMTHEVYNGTPTSLANLARLRMYGVGLSIDDFGTGY  
PA3258 PDE DIQGD-----AMLFLNVSPESSLLEAGHPGRTLQLLQQLGISPNRVVVIELTEQTPIDDFLLDALTALHHRAMGFSIALDDDLGAGY  
PA2133 PDE AEPT-----LRLACNLSR-QSAAMDAAWEAVCRWLAARPQVARRLTLEL TETAVGERV-ATREFIRRLREHGVRLIDDFGAAH  
PA1433 PDE RHPRP-----LALSLSAAS--VRNAQAFAPLALLKAHPQEARQLTELEDERHLPAAA-ELERLSQVLRLELGCGLIQHFFGGRF  
PA4959 PDE EHRAKG---HQTKLFLVHLS-ASLQDPGLLPWLGVALLKAARLPPEESLVFQISEADATSYLKKQAKLTQGLATLHCQAAISQFGCSL  
PA1181 PDE ARIAAVEGLSISG--INLSG-NSLNDPLFLPYLDRIEHSPLRPERLYFEL TETALMNLQSVASRIVAKLRDLGCKVALDDFGAGM  
PA0861 PDE ERAQDPRAEPIGTCAINLSG-ATIGDESFLQFLTELFAARYRPPQITCFEVTETVAVANLVAAIRFINELKDTGCRFSLDDFGCSL  
PA2200 PDE PLLRE---QRSFYVSVNVTG-KDIADPGFIDFAMRQIMARESVRPEQVALEL TERTTEAQQ-CLLAGMNRRLRELGKLIYVDDFGTGH  
PA2818 PDE QLGLG---AGDHLGIVNSG-SHLASHGFVDDVRRLLGAIGSEGGPQLVLEVTEREALPHDAQLQHNIQLRELVGQWALLDDFGTGY  
PA3825 PDE GHAGK---LEPGHIGFNISA-THCHELALVDDCRELLAFAFPGHITLVLELTERELISESEVTDRLFDLHALGVKIAIDDFGTGH  
PA5295 PDE WLNGR---GLEPLHMAVNSL-SF-RQFQDSQLLPTLQRLIEEHGV DARWLEFEL TETAVMRRSDQVLQTMQALGQLGVRFSLLDDFGTGF  
PA2072 PDE SWPG---EVMVSVNSP-AQFMTGDVWQVREALRHLAHDARRLELEV TENVMLNVDGALRTMTALKELVRLNMDDDFGTGY  
PA5442 PDE EWSQR---GLN-LRVSVNSLV-HQLRQDGLDVVRSALADSLGPAQLELEL TENSQLDALDSVLATFRQLREMGVRLSDDFGTGY  
PA1727 PDE LWLDG---GHAEWNIAVNSA-LQFAHAGLVDSVRNALLRHSLPEPSHLILEV TETAMRDADASLVILEQLSAMGVGISIDDFGTGY  
PA4367 PDE EWHQD---GFDELRAVNSLST-VQLHNNALPRVSNLLQVYRLLPARSLELEV TETGLMEDISTAAQHLLSLRRAGALIAIDDFGTGY  
PA0285 PDE EWQQR---GVELEFVAVNSL-SRLFNRGGLLEERIANALEESGLEPSYLELEV TETSAVMEDEFSQSNLLCRLRLGVNLAIIDDFGTGY  
PA0575 PDE EWQKL---HAPFGPLSVNLAG-AQLGQPQLIERLEQLLEQSGLEPSRLQLEI TESFIMNQTEEFALVHLGLKRLGVQLAIDDFGTGY  
PA4601 PDE SWHKA---KVRVPKVSNSL-SA-RQFADGQLGERIAALYETGIPPAQLELEL TESILMSDVAAEQMLISGLKRLGLAIAVDDFGTGY  
PA5017 PDE ELAEA---GLGELQIAINLSP-KQFTDPPLVGSI AATLEENIPASQLELEL TESLLLDATDDTRQLLERLAKSLGLTALDDFGTGY  
PA3311 PDE SLHLA---GHERLRVAVNCCA-SNLGRASLVDEVRHALDQAGLAARFLELEV TEDALMYNIDQTIPLLERLRELGVSLSIDDFGTGY  
PA2567 PDE QWNAR---NIPLRLAINVSA-SDMEDSSFLEEAVRLAKTYDIDLSALELEF TESVLRDASAVGSVLLRARELGMGIAVDDFGTGY

Consensus: SSL YL LP D LKID SFV I II L L VVAEGVET L G QGYL P

180 190 200 210 220 230 240 250

PA3947 PDE SSDRLCEFPFSQIKLDRTFVQKMKTPRSCAVISSVVA LAQALGSLVVEGVESDEQRVRLIELG-CSIAQGYLFAFMPPEQH  
pvR PDE SSFYNLVTTPTTELKIDRSLVQGCVEDNGLNAAVISCIELGHRLLNLDVVAEGVETCEENLNLRLRG-CDRAQGFLLISKA  
VieS PDE ASLQGLAQLPFTTELKIDRSFVHDLATNYKHQQLTNMCLLQAQSLGLHCVVEGVENEETWQYLRLQGVDTCCGGYAAKP  
PA3258 PDE SSLRLWSELRPDYVKIDRHFDGHIHLDTVKREFVGSILKMARASRAQVIAEGIELPEELAVLSEMG-VDLVQGYLFGRP  
PA2133 PDE NNLDVFLDARPDKYKIDCRYTREARRSAGKAEVLRHLLALCRELAPCVVLEGLEEDDAFARLPTGD--VYLQGNAIAPP  
PA1433 PDE SLIGNLTHLGLAYLKLIDGCVLHADVREGDKRLFIEAVYRTHSIDLPLIAEQVETLGELEVRMG-LRGMAGRLFGSP  
PA4959 PDE NPFNALKHLTVQFIKIDGFSVQDLNQVE-NQETLKGLELAEHLQKLSIVPFVESA SVLATLWQAG-ATYIQGYLQGGSQAMD  
PA1181 PDE SSFNLYKKNFVYKIDGFSVRNLKDKSPVDAIVDSINQIAHRLGAVTIAEFVESREILDHARLQ-VDFAAQGYAVGRP  
PA0861 PDE SSFIYLKHLVPDYKIDGFSVKNMLEDPIIDAMVQVNHIGHVMGRTVIAEFVETVEVMEALREIG-IDYAAQGLAIGAPL  
PA2200 PDE SNLVYLANLPVDAIKIDKVFQTQSIGDSSAVELIFDKLCSMAEHLIEIGVVVEGIETQAQADHVLRRSPEALGGWHFGKA  
PA2818 PDE SSLSHLQKLAHDFKIDRSFVSSVSGS VNAVLETLIALAQRLLDLAMTAEGETREEQYLCGHS-IQWGGYLLFSPPLK  
PA3825 PDE SSLAYLRKFQVCLKIDQSFVIARIGIDTLSGHLDSIVELSAKLDLIDVAEGVETPEQRDYLAARG-VDYLQGYLIGRMPLES  
PA5295 PDE SSFVHLNSLPITLLKIDRSFVGGMDQRAENFQLVRAMINLAHNLEVVVAEGVETLRQQEQLRDFG-CDQVQGYWISPP  
PA2072 PDE SSLGLYLRTPFDYSIKIDKRFVASMETKGRDRSIVQATINLGNALNLRVTAEGVETEGQMHILRDEQ-CHELQGFLLSRP  
PA5442 PDE SSLSYLKRLLDYLIKIDQSFVDRDLTQNSEDAIIARAIAMAHSLDLKVVVAEGVETIEQRDFLVAQR-CDELQGYLIGRPL  
PA1727 PDE SSLLYLKRLLPASELKIDRGINELAHDSDDAAIVSAIVALGRTLNLKIVAEGVETEAQQEFLTRLG-CNSLQGFLLGRP  
PA4367 PDE SSLSYLKLPLDKIKIDKSFVQDLQDEDDATVRAITQLGKSLGMQVIAEGVETAEQYAYIAEG-CNEGQGYLFGSRP  
PA0285 PDE SSLMRLKRLPVHKLKIDQSFVAGLPAGVDDAAIARAIAMAHSLDLKVVVAEGVETIEHQDQALFLREHG-CDFGQGYWYGRP  
PA0575 PDE SSLSYLKRLLPDLILKIDKSFIRGLPDDPHDAAITRAITLGRSMQLTVIAEGVETEGQSFLLTHEG-CEQIQGFVLSPP  
PA4601 PDE SSLNLYKQFPIDVLIKIDRSFVDGLPHGQDDAIARAIAMAHSLNLMVIAEGVESQAQLDFLRHG-CDEVQGYLFGSRP  
PA5017 PDE SSLSYLKKFPIDVLIKIDRSFVFKDIPDSQDDMETTAVIAMAHSLNLMVIAEGVESAEQLAFLRRNR-CDIGQGYLFDPR  
PA3311 PDE SSLAYLRRLLPDLALKIDRSFIMDIPASQRDMEIAQAIAMAHSLNLMVIAEGVETPQQLAFLRENH-CELVQGYLFS  
PA2567 PDE SNWTYLRDLPLVTAIKLIDQSFTRDLAGSPKAQSVTQAVIGLASQLGYRVVAEGVETHTDFHLLQAWG-CHEGQGYLIAQP

Figure 6D
