# Supplementary material
Source: PubMed Central journal article supplement (PMC1413825)
Supplement: pnas_0511090103_5.pdf [file pnas_0511090103_5.pdf]

**Table 2. Summary of phenotypes from PA14 mariner mutants and wild-type PA14-containing overexpressing clones**

| PAO1#       | PA14 Locus | Consensus Motif |     | Transposon mutant ID | Tn mutant phenotype |                       | Overexpression Phenotype |                       |
|-------------|------------|-----------------|-----|----------------------|---------------------|-----------------------|--------------------------|-----------------------|
|             |            | DGC             | PDE |                      | Pellicle formation  | CHO cell cytotoxicity | Pellicle formation       | CHO cell cytotoxicity |
| PA0169      | PA14_02110 | GGEEF           |     | 55715                | -                   | +                     | +                        | +                     |
| PA0285      | PA14_03720 | GGDEF           | ESL | 22718                | P                   | +                     | +                        | -                     |
| PA0290      | PA14_03790 | GGEEF           |     | 41047                | +                   | +                     | +                        | +                     |
| PA0338      | PA14_04420 | GGEEF           |     | 55979                | +                   | +                     | P                        | +                     |
| PA0575      | PA14_07500 | GGDEF           | EAL | 28704                | +                   | +                     | +                        | +                     |
| PA0847      | PA14_53310 | GGDEF           |     | 24080                | +                   | +                     | P                        | +                     |
| PA0861      | PA14_53140 | GGDEF           | ELL | 289                  | P                   | +                     | +                        | +                     |
| PA1107      | PA14_50060 | GGEEF           |     | 35398                | -                   | +                     | P                        | +                     |
| PA1120      | PA14_49890 | GGDEF           |     | 37761                | -                   | +                     | P                        | +                     |
| PA1181      | PA14_49160 | GGDEF           | ELL | 28187                | +                   | +                     | +                        | +                     |
| PA1433      | PA14_45930 | RGGEF           | KVL | 55781                | +                   | +                     | +                        | +                     |
| PA1727      | PA14_42220 | GGDEF           | EAL | 42074                | +                   | +                     | P                        | +                     |
| PA1851      | PA14_40570 | GGEEF           |     | 41347                | +                   | +                     | +                        | +                     |
| PA2072      | PA14_37690 | GGDEF           | EAL | 26941                | +                   | +                     | +                        | +                     |
| PA2133      | PA14_36990 |                 | ETL | 26651                | +                   | +                     | -                        | -                     |
| PA2200      | PA14_36260 |                 | EAL | 703                  | +                   | +                     | +                        | -                     |
| PA2567      | PA14_31330 | SPTRF           | EAL | 27009                | +                   | +                     | +                        | +                     |
| PA2771      | PA14_26970 | GGEEF           |     | NA                   | NA                  | NA                    | +                        | +                     |
| PA2818      | PA14_23130 |                 | EAL | NA                   | NA                  | NA                    | +                        | +                     |
| PA2870      | PA14_21870 | GGEEF           |     | NA                   | NT                  | NT                    | +                        | -                     |
| PA3177      | PA14_21190 | GGEEF           |     | 29609                | +                   | +                     | +                        | +                     |
| PA3258      | PA14_20820 | GGDDF           | EAL | 23726                | +                   | +                     | +                        | -                     |
| PA3311      | PA14_16500 | AGDEF           | EAL | 26026                | P                   | +                     | +                        | +                     |
| PA3343      | PA14_14530 | GGEEF           |     | 27296                | P                   | +                     | +                        | +                     |
| PA3702      | PA14_12810 | GGEEF           |     | 28622                | -                   | -                     | P                        | +                     |
| PA3825      | PA14_56280 |                 | EVL | 25360                | +                   | +                     | +                        | -                     |
| PA3947      | PA14_56790 |                 | EVL | 56032                | +                   | -                     | +                        | -                     |
| PA4332      | PA14_57140 | GGEEF           |     | 26451                | P                   | +                     | P                        | +                     |
| PA4367      | PA14_60870 | GGDQF           | EAL | 52637                | P                   | +                     | +                        | -                     |
| PA4396      | PA14_64050 | DEQHF           |     | 30693                | +                   | +                     | +                        | -                     |
| PA4601      | PA14_65090 | GGDEF           | EAL | 26307                | +                   | +                     | +                        | +                     |
| PA4843      | PA14_65540 | GGEEF           |     | 54304                | +                   | +                     | +                        | +                     |
| PA4929      | PA14_66320 | GGEEF           |     | 29089                | +                   | +                     | +                        | +                     |
| PA4959      | PA14_69900 | GDSIF           | EVL | 33928                | -                   | -                     | +                        | +                     |
| PA5017      | PA14_71850 | ASNEF           | EAL | 45771                | P                   | +                     | +                        | -                     |
| PA5295      | PA14_72420 | GSDEF           | EAL | 23485                | +                   | +                     | +                        | +                     |
| PA5442      | PA14_42350 | AGDEF           | EAL | 30226                | +                   | +                     | +                        | +                     |
| PA5487      | PA14_50290 | GGEEF           |     | 33256                | -                   | +                     | P                        | +                     |
| <i>pvrR</i> |            |                 | EAL | 44482                | -                   | -                     | +                        | +                     |
| <i>fliC</i> | PA14_23970 |                 |     | 36424                | -                   | -                     | -                        | -                     |
| <i>pilA</i> | PA14_58730 |                 |     | 25907                | -                   | -                     | -                        | -                     |
| <i>pseC</i> |            |                 |     | 29579                | +                   | -                     | NT                       | -                     |
| <i>xcpQ</i> | GID829     |                 |     | 26075                | +                   | +                     | NT                       | NT                    |
| <i>rpoN</i> | GID1458    |                 |     | 38940                | +                   | +                     | NT                       | NT                    |
| PA14        |            |                 |     | wild type            | +                   | +                     | +                        | +                     |

Summary of phenotypes from PA14 mariner mutants (columns 6 and 7) and wild-type PA14 containing overexpressing clones (columns 8 and 9). Transposon mutants are listed using the ID numbers used by the PA14 transposon mutant library database. P, increased pellicle formation. A wild-type phenotype is designated by the plus sign, and a negative phenotype is designated by the minus sign. NT, not tested; NA, not applicable. There was no mutant available for PA2870.
