# Supplementary material
Source: PubMed Central journal article supplement (PMC1413825)

# GGDEF

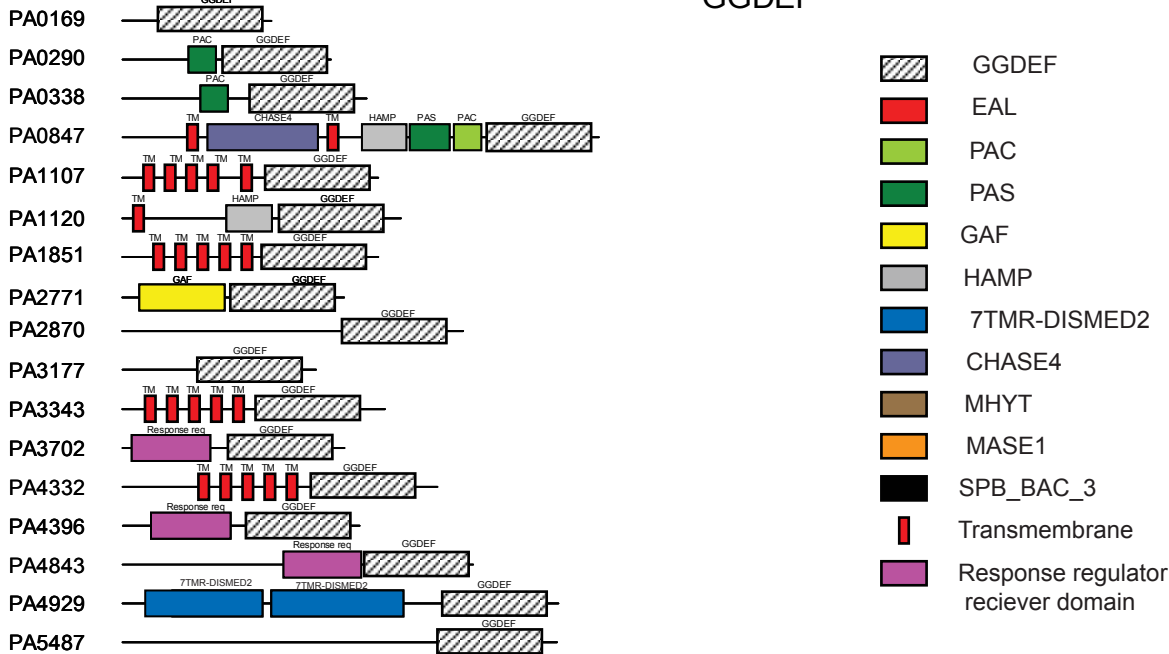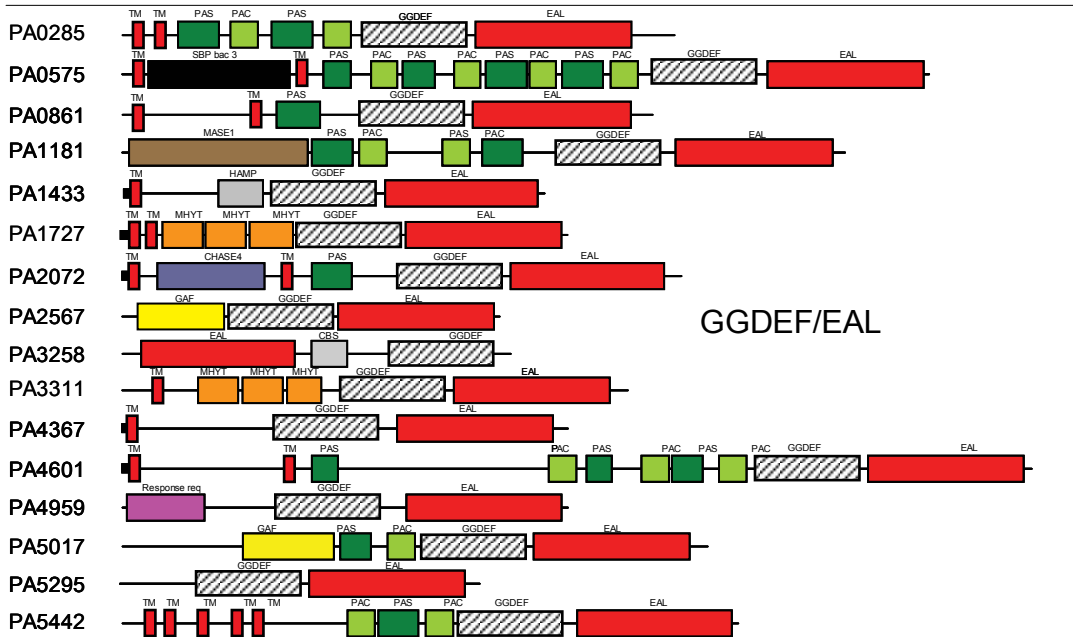

# GGDEF/EAL

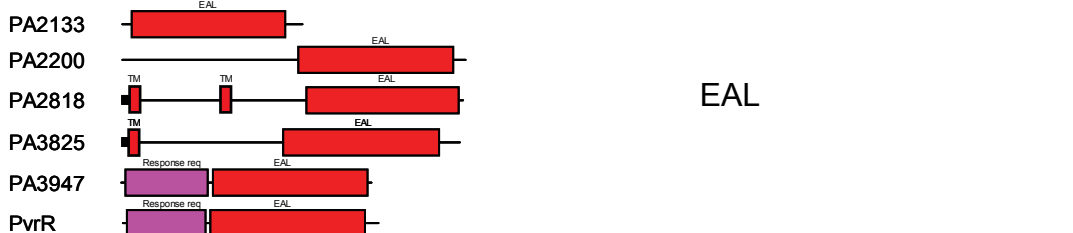

# EAL

Supplement: pnas_0511090103_1.pdf [file pnas_0511090103_1.pdf]

**A**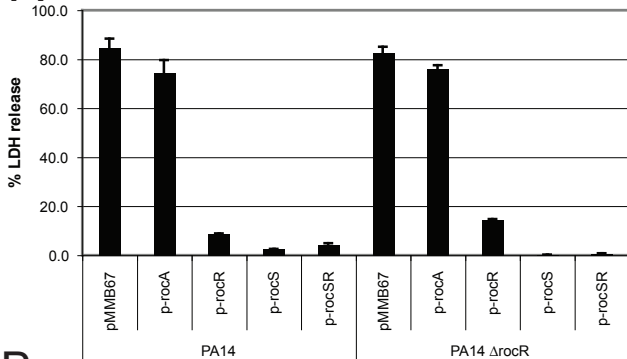**B**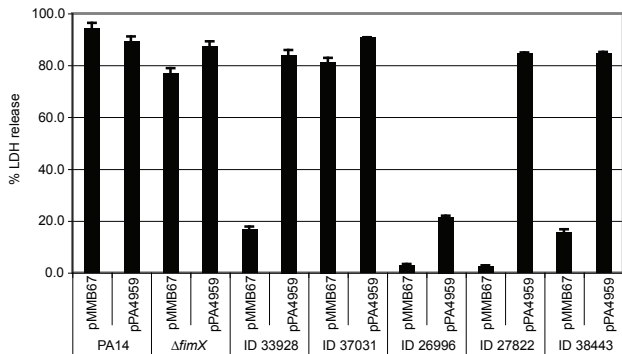

Supplement: pnas_0511090103_4.pdf [file pnas_0511090103_4.pdf]
